# Supplementary material for: Fatty Acids and Their Lipogenic Enzymes in Anorexia Nervosa Clinical Subtypes
Source: MDPI journal article supplement (doi:10.3390/ijms25105516), 2024-05-18
Supplement: s1 [file s1]

**Table S1:** Fasting levels of fatty acids (pmol/mL), fatty acid ratios, and lipogenic enzyme activities in anorexia nervosa (AN) subtypes and healthy controls.

| Marker                                              | AN-R                      | AN-BP                     | Controls                  |
|-----------------------------------------------------|---------------------------|---------------------------|---------------------------|
| Lauric acid (12:0)                                  | 8914.68 ± 9945.90         | 16830.55 ± 16701.84       | 10481.09 ± 4795.41        |
| Myristic acid (14:0)                                | 50136.54 ± 30694.17       | 73790.11 ± 93474.3        | 50916.08 ± 21685.32       |
| Pentadecanoic (15:0)                                | 11288.57 ± 4482.27        | 10378.23 ± 4694.72        | 10599.37 ± 5244.86        |
| Palmitic acid (16:0)                                | 1005743.20 ±<br>206127.37 | 1070063.39 ±<br>263743.18 | 1025960.57 ±<br>344304.59 |
| Palmitoleic acid<br>(16:1)                          | 57936.60 ± 44632.79       | 96888.91 ±<br>128445.35   | 68043.53 ± 29452.17       |
| Margaric acid (17:0)                                | 14534.13 ± 4003.11        | 13055.27 ± 4512.53        | 13876.79 ± 6315.98        |
| Heptadecanoic acid<br>(17:1)                        | 6028.88 ± 2866.68         | 6480.07 ± 3818.77         | 6362.45 ± 3181.18         |
| Stearic acid (18:0)                                 | 305166.43 ±<br>85513.97   | 328309.94 ±<br>66781.38   | 323459.30 ±<br>130196.54  |
| Oleic acid (18:1)                                   | 27123.58 ± 4685.16        | 28421.42 ± 9204.47        | 24898.3 ± 4921.32         |
| Linoleic acid (LA,<br>18:2)                         | 59263.21 ± 11112.09       | 60759.18 ± 15933.03       | 53759.62 ± 14851.29       |
| Alpha-linolenic acid<br>(ALA, 18:3 n-3)             | 1967.63 ± 823.35          | 1720.28 ± 1753.45         | 1438.60 ± 505.45          |
| Gamma-linolenic<br>acid (GLA, 18:3 n-6)             | 1978.85 ± 897.01          | 1674.55 ± 468.71          | 1434.15 ± 930.74          |
| Stearidonic acid<br>(18:4)                          | 89.14 ± 57.03             | 74.06 ± 78.6              | 55.77 ± 44.18             |
| Gadoleic acid (20:1)                                | 5085.97 ± 28              | 6760.94 ± 6422.71         | 6251.28 ± 4997.82         |
| Eicosadienoic acid<br>(20:2)                        | 4851.88 ± 1832.92         | 4955.08 ± 2007.16         | 5357.85 ± 2744.99         |
| 11,14,17-<br>eicosatrienoic acid<br>(ETE, 20:3 n-3) | 1337.83 ± 546.94          | 1252.33 ± 973.67          | 1321.15 ± 942.57          |
| Dihomo-gamma-<br>linolenic acid<br>(DGLA, 20:3 n-6) | 70084.85 ± 23843.19       | 72807.93 ± 23463.11       | 67504.50 ± 35614.33       |
| 5,8,11-eicosatrienoic<br>acid (20:3 n-9)            | 4636.02 ± 4847.54         | 5231.92 ± 5519.49         | 4419.48 ± 3809.78         |
| Arachidonic acid<br>(ARA, 20:4)                     | 311016.06 ±<br>85338.71   | 329178.15 ±<br>105018.75  | 323960.90 ±<br>124173.96  |
| Eicosapentaenoic<br>acid (EPA, 20:5)                | 31166.98 ± 14066.38       | 32264.07 ± 20645.57       | 24117.29 ± 10821.17       |
| Erucic acid (22:1)                                  | 124.24 ± 267.7            | 106.74 ± 85.19            | 115.90 ± 70.96            |
| Adrenic acid (22:4)                                 | 7316.02 ± 3385.61         | 8227.12 ± 3567.16         | 8435.35 ± 3913.56         |
| Docosapentaenoic<br>acid (DPA, 22:5 n-3)            | 30390.87 ± 14342.64       | 27020.93 ± 12267.54       | 24527.07 ± 10091.11       |

|                                          |                        |                        |                        |
|------------------------------------------|------------------------|------------------------|------------------------|
| Osbond acid (22:5 n-6)                   | 15598.74 ± 4130.66     | 18633.54 ± 11097.56    | 17540.27 ± 8846.25     |
| Docosahexaenoic acid (DHA, 22:6)         | 128916.27 ± 54949.75   | 142936.61 ± 74238.23   | 147660.48 ± 71480.59   |
| Nervonic acid (24:1)                     | 148.38 ± 97.02         | 164.63 ± 98.83         | 152.07 ± 104.27        |
| Total saturated fatty acids (SFA)        | 1395783.55 ± 307898.67 | 1512427.49 ± 401361.78 | 1435293.21 ± 490248.97 |
| Total monounsaturated fatty acids (MUFA) | 96447.65 ± 49825.06    | 138822.70 ± 133259.76  | 105823.53 ± 37917.36   |
| Total polyunsaturated fatty acids (PUFA) | 668614.35 ± 136291.54  | 706735.74 ± 195819.72  | 681532.47 ± 239452.54  |
| Total n-3 PUFA                           | 193868.72 ± 55985.04   | 205268.28 ± 99263.8    | 199120.35 ± 83982.42   |
| Total n-6 PUFA                           | 470109.61 ± 105605.21  | 496235.54 ± 128137.38  | 477992.64 ± 166474.50  |
| Total n-7 fatty acids                    | 63965.47 ± 47006.08    | 103368.98 ± 131468.66  | 74405.98 ± 32278.60    |
| Total n-9 fatty acids                    | 37118.20 ± 7542.74     | 40685.64 ± 14477.76    | 35837.03 ± 8809.98     |
| Total PUFA/total SFA                     | 0.49 ± 0.10            | 0.47 ± 0.05            | 0.49 ± 0.08            |
| Total unsaturated (MUFA+PUFA)/total SFA  | 0.57 ± 0.10            | 0.56 ± 0.06            | 0.56 ± 0.09            |
| Total n-6/total n-3 PUFA                 | 2.65 ± 0.67            | 2.8 ± 0.99             | 2.65 ± 0.78            |
| Stearoyl-CoA desaturase-16 (SCD16)       | 0.06 ± 0.04            | 0.08 ± 0.07            | 0.06 ± 0.02            |
| Stearoyl-CoA desaturase-18 (SCD18)       | 0.11 ± 0.02            | 0.1 ± 0.04             | 0.09 ± 0.07            |
| Delta-6-desaturase (D6D)                 | 0.03 ± 0.01            | 0.02 ± 0.01            | 0.02 ± 0.01            |
| Delta-5-desaturase (D5D)                 | 4.94 ± 1.88            | 4.94 ± 1.88            | 5.46 ± 1.88            |
| Elongase-6 (ELOVL6)                      | 0.3 ± 0.05             | 0.31 ± 0.05            | 0.31 ± 0.06            |
| Elongase-5 (ELOVL5)                      | 198.76 ± 130.05        | 216.24 ± 196.42        | 295.94 ± 257.58        |
| Elongase-2 (ELOVL2)                      | 0.02 ± 0.01            | 0.03 ± 0.01            | 0.03 ± 0.01            |

**Note:** Data are in mean ± standard deviation. AN-R: restricting anorexia nervosa subtype; AN-BP: bingeing and purging anorexia nervosa subtype; total SFA: lauric acid + myristic acid + pentadecanoic acid + palmitic acid + margaric acid + stearic acid + arachidic acid; total MUFA: palmitoleic acid + heptadecanoic acid + oleic acid + gadoleic acid + erucic acid + nervonic acid; total PUFA: ALA + stearidonic acid + ETE + EPA +

DPA + DHA + LA + GLA + DGLA + ARA + adrenic acid + osbond acid + 5,8,11-eicosatrienoic acid; total n-3 PUFA: ALA + stearidonic acid + ETE + EPA + DPA + DHA; total n-6 PUFA: LA + GLA + DGLA + ARA + adrenic acid + osbond acid; total n-7 fatty acids: palmitoleic acid + heptadecanoic acid; total n-9 fatty acids: oleic acid + gadoleic acid + erucic acid + nervonic acid + 5,8,11-eicosatrienoic acid; SCD16: palmitoleic acid/palmitic acid; SCD18: oleic acid/stearic acid; D6D: GLA/LA; D5D: ARA/DGLA; ELOVL6: stearic acid/palmitic acid; ELOVL5: DGLA/GLA; ELOVL2: adrenic acid/ARA.

**Table S2:** Postprandial levels of fatty acids (pmol/mL), fatty acid ratios, and lipogenic enzyme activities in anorexia nervosa (AN) subtypes and healthy controls.

| Marker                                       | AN-R                   | AN-BP                  | Controls               |
|----------------------------------------------|------------------------|------------------------|------------------------|
| Lauric acid (12:0)                           | 10813.00 ± 6287.88     | 12571.02 ± 12246.17    | 9261.42 ± 5077.94      |
| Myristic acid (14:0)                         | 57184.72 ± 32951.15    | 70150.33 ± 87367.68    | 49634.63 ± 23688.96    |
| Pentadecanoic (15:0)                         | 11652.94 ± 3598.73     | 10489.22 ± 4533.44     | 10665.83 ± 5262.18     |
| Palmitic acid (16:0)                         | 1041851.57 ± 165265.53 | 1085918.50 ± 335867.13 | 1039544.15 ± 350885.39 |
| Palmitoleic acid (16:1)                      | 64642.12 ± 34507.2     | 86754.79 ± 137262.86   | 61011.34 ± 31089.03    |
| Margaric acid (17:0)                         | 14038.18 ± 3880.24     | 13059.39 ± 5284.44     | 14040.13 ± 6571.54     |
| Heptadecanoic acid (17:1)                    | 6328.83 ± 2702.40      | 5605.26 ± 2871.74      | 6487.6 ± 3905.22       |
| Stearic acid (18:0)                          | 307031.03 ± 76442.75   | 316064.00 ± 113132.50  | 326863.17 ± 141596.56  |
| Oleic acid (18:1)                            | 28138.57 ± 4857.29     | 24390.16 ± 4235.2      | 25165.75 ± 4975.84     |
| Linoleic acid (LA, 18:2)                     | 63628.73 ± 10969.57    | 65914.61 ± 18745.1     | 58010.31 ± 15986.77    |
| Alpha-linolenic acid (ALA, 18:3 n-3)         | 1984.82 ± 759.27       | 1554.55 ± 651.19       | 1232.71 ± 468.15       |
| Gamma-linolenic acid (GLA, 18:3 n-6)         | 2194.88 ± 1030.47      | 2181.60 ± 2338.22      | 1631.15 ± 1146.34      |
| Stearidonic acid (18:4)                      | 85.29 ± 50             | 70.50 ± 59.49          | 55.72 ± 45.26          |
| Gadoleic acid (20:1)                         | 4807.98 ± 2744.39      | 5766.00 ± 4158.26      | 6600.83 ± 5282.75      |
| Eicosadienoic acid (20:2)                    | 4598.27 ± 1662.59      | 4664.74 ± 1770.23      | 5397.35 ± 2996.83      |
| 11,14,17-eicosatrienoic acid (ETE, 20:3 n-3) | 1268.20 ± 555.38       | 1083.14 ± 743.46       | 1348.20 ± 1056.8       |
| Dihomo-gamma-linolenic acid (DGLA, 20:3 n-6) | 71763.62 ± 25950.23    | 68845.15 ± 24901.50    | 70845.70 ± 39445.71    |
| 5,8,11-eicosatrienoic acid (20:3 n-9)        | 3689.31 ± 4337.47      | 5778.44 ± 6218.61      | 4168.36 ± 3736.23      |
| Arachidonic acid (ARA, 20:4)                 | 319198.42 ± 77896.35   | 351298.38 ± 139348.71  | 343075.11 ± 133327.06  |
| Eicosapentaenoic acid (EPA, 20:5)            | 29411.89 ± 18024.86    | 40029.01 ± 26408.09    | 24266.61 ± 11398.68    |
| Erucic acid (22:1)                           | 107.88 ± 116.17        | 86.44 ± 56.24          | 100.35 ± 56.28         |
| Adrenic acid (22:4)                          | 6710.72 ± 2062.1       | 7966.78 ± 4055.25      | 8691.34 ± 4393.75      |
| Docosapentaenoic acid (DPA, 22:5 n-3)        | 26405.93 ± 11006.72    | 28928.20 ± 10530.21    | 23597.35 ± 9700.56     |

|                                          |                        |                        |                        |
|------------------------------------------|------------------------|------------------------|------------------------|
| Osbond acid (22:5 n-6)                   | 17247.99 ± 6144.73     | 19782.89 ± 14426.29    | 18858.13 ± 10238.02    |
| Docosahexaenoic acid (DHA, 22:6)         | 153216.56 ± 60386.01   | 170090.73 ± 93032.17   | 158394.28 ± 68245.39   |
| Nervonic acid (24:1)                     | 124.21 ± 102.72        | 143.67 ± 129.44        | 146.01 ± 118.22        |
| Total saturated fatty acids (SFA)        | 1442571.45 ± 232508.39 | 1508252.46 ± 496761.19 | 1450009.32 ± 505674.96 |
| Total monounsaturated fatty acids (MUFA) | 104149.59 ± 41867.91   | 122746.32 ± 141730.26  | 99511.87 ± 40956.83    |
| Total polyunsaturated fatty acids (PUFA) | 701404.61 ± 160067.23  | 768188.71 ± 270699.8   | 719572.33 ± 249414.5   |
| Total n-3 PUFA                           | 212372.67 ± 80320.76   | 241756.13 ± 120926.75  | 208894.88 ± 81156.91   |
| Total n-6 PUFA                           | 485342.63 ± 99564.9    | 520654.15 ± 179306.35  | 506509.09 ± 179432.49  |
| Total n-7 fatty acids                    | 70970.95 ± 36906.64    | 92360.04 ± 139781.97   | 67498.93 ± 34495.4     |
| Total n-9 fatty acids                    | 36867.96 ± 7761.81     | 36164.71 ± 9230.07     | 36181.30 ± 9486.03     |
| Total PUFA/total SFA                     | 0.49 ± 0.08            | 0.51 ± 0.07            | 0.50 ± 0.08            |
| Total unsaturated (MUFA+PUFA)/total SFA  | 0.56 ± 0.07            | 0.59 ± 0.08            | 0.57 ± 0.08            |
| Total n-6/total n-3 PUFA                 | 2.54 ± 0.66            | 2.47 ± 0.88            | 2.62 ± 0.63            |
| Stearoyl-CoA desaturase-16 (SCD16)       | 0.06 ± 0.02            | 0.07 ± 0.07            | 0.06 ± 0.02            |
| Stearoyl-CoA desaturase-18 (SCD18)       | 0.11 ± 0.03            | 0.10 ± 0.09            | 0.10 ± 0.07            |
| Delta-6-desaturase (D6D)                 | 0.03 ± 0.01            | 0.02 ± 0.02            | 0.02 ± 0.01            |
| Delta-5-desaturase (D5D)                 | 5.12 ± 2.09            | 5.29 ± 1.75            | 5.48 ± 1.72            |
| Elongase-6 (ELOVL6)                      | 0.29 ± 0.06            | 0.29 ± 0.08            | 0.31 ± 0.08            |
| Elongase-5 (ELOVL5)                      | 178.22 ± 143.36        | 148.15 ± 62.7          | 252.46 ± 194.76        |
| Elongase-2 (ELOVL2)                      | 0.02 ± 0.01            | 0.02 ± 0.01            | 0.03 ± 0.01            |

**Note:** Data are in mean ± standard deviation. AN-R: restricting anorexia nervosa subtype; AN-BP: bingeing and purging anorexia nervosa sub-type; total SFA: lauric acid + myristic acid + pentadecanoic acid + palmitic acid + margaric acid + stearic acid + arachidic acid; total MUFA: palmitoleic acid + heptadecanoic acid + oleic acid + gadoleic acid + erucic acid + nervonic acid; total PUFA: ALA + stearidonic acid + ETE + EPA + DPA + DHA + LA + GLA + DGLA + ARA + adrenic acid + osbond acid + 5,8,11-eicosatrienoic acid; total n-3 PUFA: ALA + stearidonic acid + ETE + EPA + DPA + DHA; total n-6 PUFA: LA + GLA + DGLA + ARA + adrenic acid + osbond acid; total n-7 fatty acids: palmitoleic acid + heptadecanoic acid; total n-9 fatty acids: oleic acid + gadoleic acid + erucic acid + nervonic acid + 5,8,11-eicosatrienoic acid; SCD16: palmitoleic acid/palmitic acid; SCD18: oleic acid/stearic acid; D6D: GLA/LA; D5D: ARA/DGLA; ELOVL6: stearic acid/palmitic acid; ELOVL5: DGLA/GLA; ELOVL2: adrenic acid/ARA.

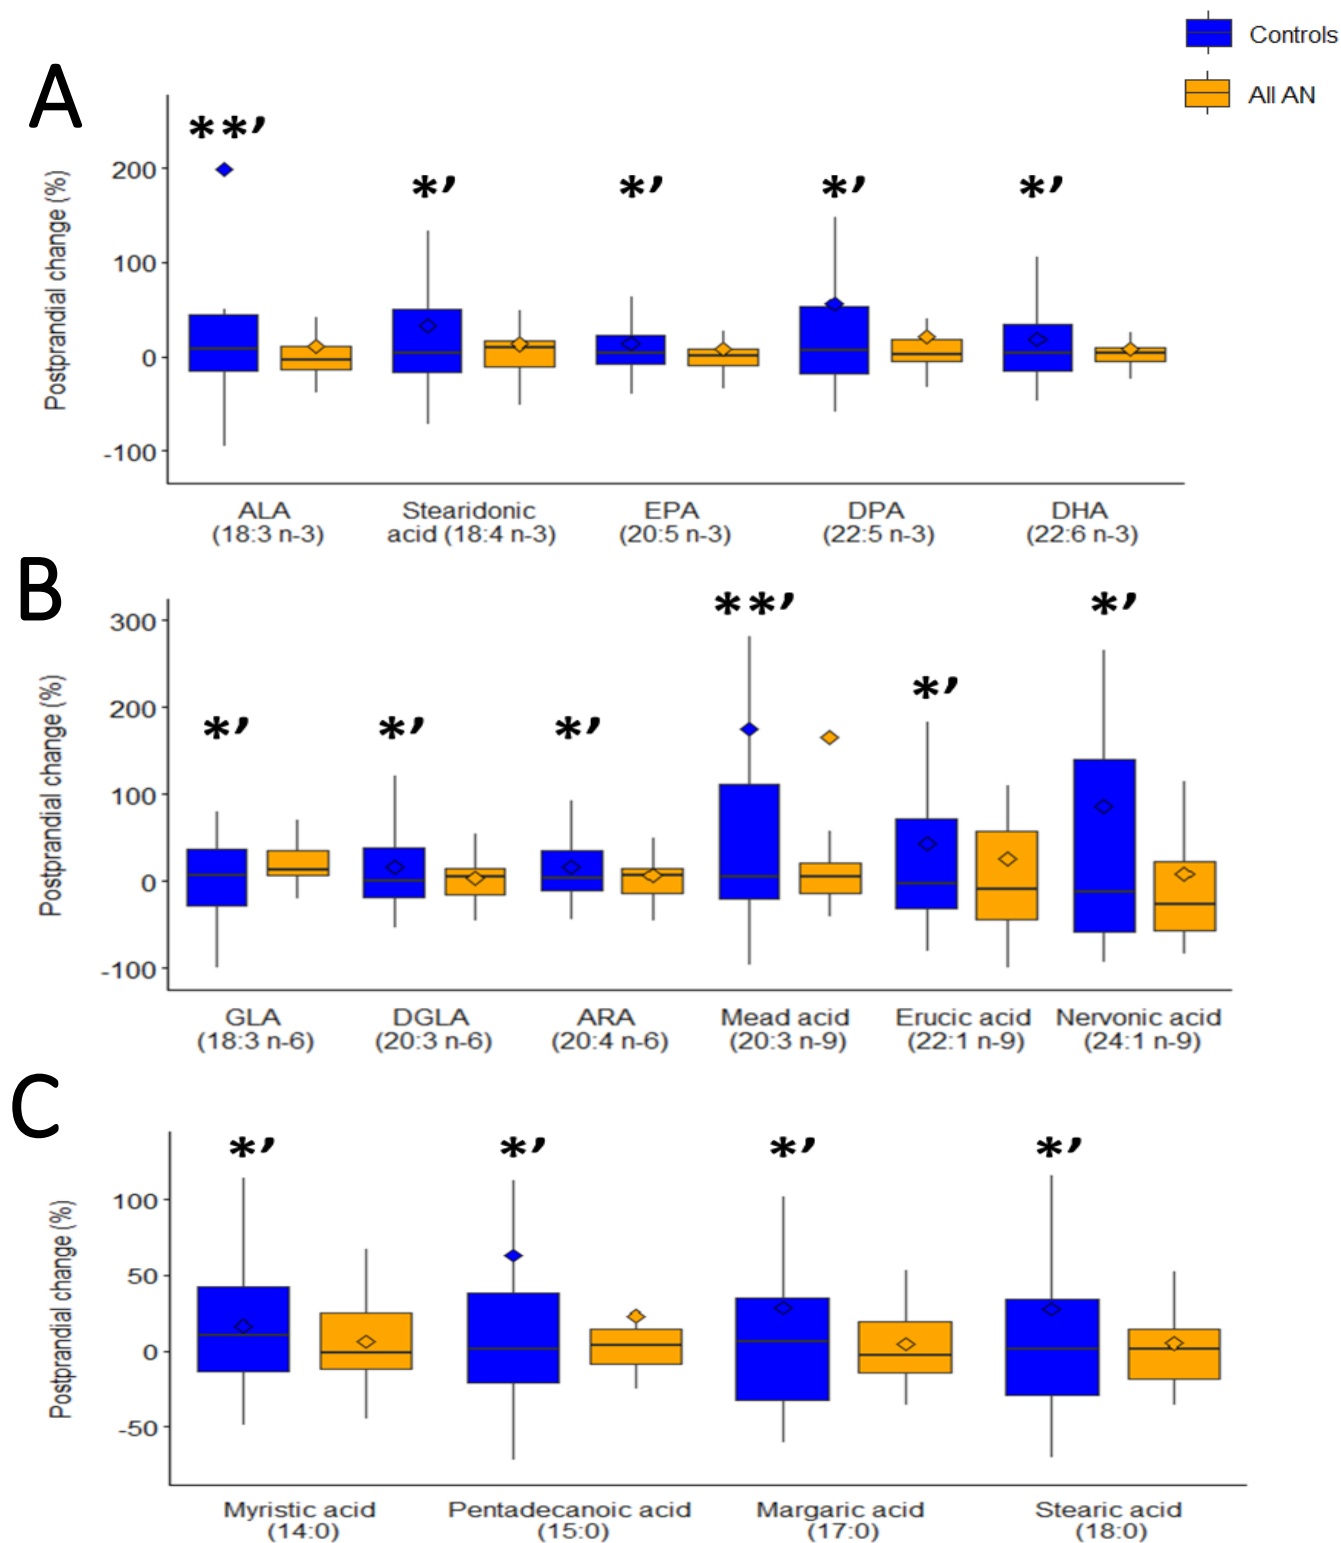

**Figure S1:** Fatty acids that showed significant postprandial percent changes in controls (blue) but not in AN (orange). n-3 (A), n-6 and n-9 (B), and saturated (C) fatty acids are presented in panels A-C. Boxplots indicate the first quartile, median, and third quartile. Diamond shapes represent the mean percent change. \*' and \*\*' represent  $0.01 \leq p < 0.05$  and  $p < 0.01$ , respectively, using one-sample t-tests. AN: anorexia nervosa; ALA: alpha-linolenic acid; EPA: eicosapentaenoic acid; DPA: docosapentaenoic acid;

DHA: docosahexaenoic acid; GLA: gamma-linolenic acid; DGLA: dihomogamma-linolenic acid; ARA: arachidonic acid.
